# Supplementary material for: Crystalline triphenylamine substituted arenes: solid state packing and luminescence properties
Source: Royal Society of Chemistry journal article supplement (doi:10.1039/c6ce02321e), 2016-12-19
Supplement: c6ce02321e1.pdf [file c6ce02321e1.pdf]

# Crystalline triphenylamine substituted arenes: solid state packing and luminescence properties

Ajith R. Mallia,<sup>‡</sup> Remya Ramakrishnan,<sup>‡</sup> M. A. Niyas and Mahesh Hariharan\*

School of Chemistry, Indian Institute of Science Education and Research Thiruvananthapuram, CET Campus,  
Sreekaryam, Thiruvananthapuram, Kerala, India 695016

## Electronic Supplementary Information

| SI No: | Contents                                                                                                                                                                                                                                                                                                                                   | Page No: |
|--------|--------------------------------------------------------------------------------------------------------------------------------------------------------------------------------------------------------------------------------------------------------------------------------------------------------------------------------------------|----------|
| 1.     | Methods.                                                                                                                                                                                                                                                                                                                                   | S2       |
| 2.     | <b>Table S1.</b> Calculated topological properties of the electron density for the intermolecular interaction in ArT derivatives.                                                                                                                                                                                                          | S5       |
| 3.     | <b>Table S2.</b> Various intermolecular interactions estimated for ArT derivatives from Hirshfeld surface analysis.                                                                                                                                                                                                                        | S7       |
| 4.     | <b>Table S3.</b> Geometry optimized (B3LYP/6-311+G** level of theory) calculations and redox properties of ArT derivatives using Gaussian 09.                                                                                                                                                                                              | S7       |
| 5.     | <b>Table S4.</b> Fluorescence Quantum yield ( $\phi_f$ ) of aromatic hydrocarbons.                                                                                                                                                                                                                                                         | S8       |
| 6.     | <b>Table S5.</b> Quantum yield ( $\phi_f$ ) of ArT derivatives in different solvents.                                                                                                                                                                                                                                                      | S8       |
| 6.     | <b>Fig. S1</b> <sup>1</sup> H-NMR spectra of (a) PhT, (b) NT, (c) AT, (d) PheT, (e) PyT and (f) PeT.                                                                                                                                                                                                                                       | S12      |
| 7.     | <b>Fig. S2</b> (a) C-H...C directed zig-zag arrangement in PhT and (b) duplex structure in NT.                                                                                                                                                                                                                                             | S12      |
| 8.     | <b>Fig. S3</b> (a) C...C directed arrangement in AT and (b) C-H...C directed 2D-network in AT.                                                                                                                                                                                                                                             | S13      |
| 9.     | <b>Fig. S4</b> Torsion angles between Ar and T units in (a) PhT, (b) NT, (c) AT, (d-e) PheT, (f) PyT and (g) PeT (torsion angle is measured across the labelled bonds).                                                                                                                                                                    | S13      |
| 11.    | <b>Fig. S5</b> QTAIM electron density maps of (a) PhTa, (b) PhTb, (c) NTa, (d) NTb, (e) AT, (f) PheTa, (g) PheTb, (h) PheTc, (i) PyT and (j) PeTb. Dotted lines shown are bond paths and the green dots are bond critical points (BCP). Bond path with a BCP indicate the existence of intermolecular interactions in different molecules. | S18      |
| 12.    | <b>Fig. S6</b> 2D-dimensional fingerprint plots representing C...C interactions in crystalline (a) PhT, (b) NT, (c) AT, (d) PheT, (e) PyT and (f) PeT obtained from Hirshfeld analyses.                                                                                                                                                    | S19      |
| 13.    | <b>Fig. S7</b> 2D-dimensional fingerprint plots representing C-H...C interactions in crystalline (a) PhT, (b) NT, (c) AT, (d) PheT, (e) PyT and (f) PeT obtained from Hirshfeld analyses.                                                                                                                                                  | S19      |

|     |                                                                                                                                                                                                          |     |
|-----|----------------------------------------------------------------------------------------------------------------------------------------------------------------------------------------------------------|-----|
| 14. | <b>Fig. S8</b> 2D-dimensional fingerprint plots representing C-H...H-C interactions in crystalline (a) PhT, (b) NT, (c) AT, (d) PheT, (e) PyT and (f) PeT obtained from Hirshfeld analyses.              | S20 |
| 15. | <b>Fig. S9.</b> Cyclic voltammetric measurements of ArT derivatives in DCM.                                                                                                                              | S20 |
| 16. | <b>Fig. S10</b> The absorption spectra of anthracene, pyrene and perylene in DCM.                                                                                                                        | S21 |
| 17. | <b>Fig. S11</b> (a) Excitation spectra and (b) fluorescent decay profile of ArT in DCM.                                                                                                                  | S21 |
| 18. | <b>Fig. S12</b> Solvent polarity dependent normalized emission spectra of (a) PhT, (c) NT, (e) PyT and (g) PeT. Solvent polarity dependent Lippert-Mataga plots of (b) PhT, (d) NT, (f) PyT and (h) PeT. | S22 |
| 19. | <b>Fig. S13</b> CIE coordinates of ArT derivatives in (a) DCM and (b) crystalline state.                                                                                                                 | S23 |
| 20. | REFERENCES                                                                                                                                                                                               | S23 |

---

## Methods

### Quantum Yield and lifetime Measurements

Solution state relative quantum yield measurements were performed using quinine sulphate in 0.05 M H<sub>2</sub>SO<sub>4</sub> as the reference (reported quantum yield  $\Phi_f = 0.546$ ), exciting at 350 nm for NT, AT, PheT and PyT. Fluorescein in ethanol was used as the reference (reported quantum yield  $\Phi_f = 0.79$ ) to measure solution state relative quantum yield of PeT exciting at 425 nm. Anthracene in cyclohexane was used as reference (reported quantum yield  $\Phi_f = 0.36$ ) to estimate the solution state relative quantum yield of PhT exciting at 340 nm. The solid state quantum yield of ArT derivatives was measured using an integrating sphere for which the accuracy was verified using tris(8-hydroxyquinolate)aluminium (Alq<sub>3</sub>) as a standard and is determined to be  $0.37 \pm 0.04$  (reported quantum yield  $\Phi_f = 0.40$ ).

Lifetime measurements were carried out in an IBH picosecond time correlated single photon counting (TCSPC) system. The detection system consisted of a micro channel plate photomultiplier (5000U-09B, Hamamatsu) coupled to a monochromator (500M) and TCSPC electronics (Data station Hub including Hub-NL, NanoLED controller and pre-installed luminescence measurement and analysis studio (FMAS) software. The fluorescence decay profiles were de-convoluted using IBH data station software version 2.1, and fitted with exponential decay, minimizing the  $\chi^2$  values. Average fluorescence lifetime values were estimated<sup>1</sup> using equation 1.

$$\tau_f = \frac{\alpha_1 \tau_1^2 + \alpha_2 \tau_2^2 + \alpha_3 \tau_3^2 + \dots}{\alpha_1 \tau_1 + \alpha_2 \tau_2 + \alpha_3 \tau_3 + \dots} \quad (1)$$

where  $\alpha_1$ ,  $\alpha_2$ , and  $\alpha_3$  corresponds to the amplitudes corresponding to the fluorescence lifetimes  $\tau_1$ ,  $\tau_2$ , and  $\tau_3$  respectively. The average fluorescence lifetime ( $\tau_f$ ) values was used to determine the radiative ( $k_r$ ) and non-radiative rate constant ( $k_{nr}$ )<sup>1</sup> as follows,

$$\Phi_f = \frac{k_r}{k_r + k_{nr}} \quad (2)$$

$$k_r = \frac{\Phi_f}{\tau_f} \quad (3)$$

$$k_{nr} = \frac{1 - \Phi_f}{\tau_f} \quad (4)$$

$\Phi_f$ , denotes solid state fluorescence quantum yield. Variations in  $\Phi_f$  could be attributed to the changes in  $k_r$  or  $k_{nr}$ . An enhancement in  $\Phi_f$  could be attributed to the decrease in the non-radiative ( $k_{nr}$ ) rate constant.

**X-ray crystallography:** High-quality specimens of appropriate dimensions were selected for the X-ray diffraction experiments. Crystallographic data collected are presented in the supplementary information. Single crystals were mounted using oil (Infinitec V8512) on a glass fibre. All measurements were made on a CCD area detector with graphite monochromated Mo K $\alpha$  radiation ( $\lambda = 0.71073$  Å at 298 K). The data was obtained using Bruker APEXII detector and processed using APEX2 from Bruker. All structures were solved by direct methods and expanded using Fourier techniques. The non-hydrogen atoms were refined anisotropically. Hydrogen atoms were included in idealized positions, but not refined. Their positions were constrained relative to their parent atom using the appropriate HFIX command in SHELXL-97. The full validation of CIFs and structure factors of ArT derivatives were performed using CheckCIF and found to be free from major alert level. 3D structure visualization and the exploration of the crystal packing of ArT derivatives were carried out using Mercury 3.8.

**Determination of degree of charge separation from Lippert-Mataga plot<sup>2</sup>:** The origin of solvent polarity dependent Stokes shifts could be explained using Lippert-Mataga (L-M) plots and Onsager's reaction field model, approximating that a dipole is placed at the center of a vacuum cavity in a homogeneous dielectric medium. The interaction between the solvent and fluorophores affect the energy difference between the ground and excited states and hence the dipoles associated with them. The difference in excited ( $\mu_e$ ) and ground state ( $\mu_g$ ) dipole moments could be expressed as a function of refractive index ( $n$ ) and dielectric constant ( $\epsilon$ ) of the medium under consideration and is described as L-M equation as follows,

$$\overline{\nu}_A - \overline{\nu}_F = \frac{2}{hc} \left( \frac{\epsilon - 1}{2\epsilon + 1} - \frac{n^2 - 1}{2n^2 + 1} \right) \frac{(\mu_e - \mu_g)^2}{a^3} + \text{Constant} \quad (5)$$

wherein,  $\overline{\nu}_A - \overline{\nu}_F$  is the Stokes shift between absorption and emission intensity in respective solvents expressed in wavenumbers ( $\text{cm}^{-1}$ ), ' $h$ ' the Planck's constant in ergs ( $6.626 \times 10^{-27}$  ergs), ' $c$ ' the speed of light in cm/s ( $3 \times 10^{10}$  cm/s) and ' $a$ ' the Onsager cavity radius in which the fluorophores resides.

A plot of  $\Delta\nu$ , ( $\overline{\nu}_A - \overline{\nu}_F$ ) against solvent polarisability parameter ( $\Delta f = \left( \frac{\epsilon - 1}{2\epsilon + 1} - \frac{n^2 - 1}{2n^2 + 1} \right)$ ) yields slope equal to  $\frac{2(\mu_e - \mu_g)^2}{hca^3}$ , from which difference in excited and ground state dipole moment ( $\mu_e - \mu_g$ )

could be evaluated as,  $\mu_e - \mu_g = \sqrt{\text{slope} \times \frac{hca^3}{2}}$ . (Onsager cavity radius is estimated to be 3.74 Å (PhT), 4.03 Å (NT), 4.17 Å (AT), 4.18 Å (PheT), 4.22 Å (PyT) and 4.52 Å (PeT) respectively, from theoretical calculations using B3LYP/6-311+G\*\* level<sup>3</sup> of theory).

The degree of charge separation is estimated as follows, one Debye (1 D) unit is  $1.0 \times 10^{-18}$  esu cm. 4.8 D is the dipole moment that results from a charge separation of one unit charge ( $4.8 \times 10^{-10}$  esu) by 1 Å ( $10^{-8}$  cm). Conversion of  $\mu_e$  expressed in Debye into esu Å units is achieved dividing by a factor of  $4.8 \text{ esu}^{-1} \text{Å}^{-1}$  which can provide the experimental charge separation in the molecule. Degree

of charge separation (theoretical) in the molecule is obtained from centers of spin density distributions<sup>4</sup>.

**Analysis of Chromaticity Index<sup>5</sup>:** Coordinates (x, y, z) for chromaticity were acquired by calculating the fractional component of the tristimulus values:  $x = X/(X+Y+Z)$ ,  $y = Y/(X+Y+Z)$ ,  $z = Z/(X+Y+Z)$ . X, Y, Z are the CIE 1931 tristimulus values. By convention, chromicity coordinates (x, y) denote the two dimensional plot CIE 1931 colour space chromaticity diagram.

**Cyclic Voltammetry (CV):** Electrochemical measurements were performed on a BASi (Bioanalytical Systems, Inc.) C-3 cell stand controlled by Epsilon electrochemical workstation. A three electrode system is then constructed constituting a glassy carbon as the working electrode, a platinum-wire as the counter electrode, and an Ag/Ag<sup>+</sup> (3 M NaCl) as the reference electrode. The electrochemical measurements were conducted under nitrogen atmosphere (5 psi, 10 minutes) in a deoxygenated anhydrous chloroform of tetra-n-butylammonium hexafluorophosphate (supporting electrolyte, 0.1 M) with a scan rate of 50–100 mVs<sup>-1</sup>. Calibration of the instrument was performed using the ferrocene/ferrocenium (Fc/Fc<sup>+</sup>) redox couple as an external standard and measured under same condition before and after the measurement of samples. The energy level of Fc/Fc<sup>+</sup> was assumed to be -4.8 eV with respect to vacuum<sup>6</sup>. The half-wave potential of Fc/Fc<sup>+</sup> was estimated to be 0.5 eV with reference to the Ag/Ag<sup>+</sup> electrode.

### Computational methods

Single point energy calculations for the ArT monomers were performed at B3LYP/6-311+G\*\* level of theory using the crystal structure data with Gaussian 09 suite<sup>3</sup>. Energy gap is determined as the difference between energies of LUMO and HOMO. Energy level diagram is plotted using the energies obtained from FMO analyses.

**Quantum Theory of Atoms in Molecules (QTAIM)<sup>7</sup> :** The wave function for crystalline ArTs were obtained employing the geometries taken from the crystal structure using Gaussian set of codes at B3LYP/6-311+G\*\* level.<sup>3</sup> Quantum theory of atoms in molecules (QTAIM) analysis helps to understand the description of interatomic interaction in the single crystal X-ray structure. A bond is defined along the bond line between two nuclei, called a bond path, along which electron density is concentrated. The bond critical point (BCP) is a point along the bond path at the interatomic surface, where the shared electron density reaches a minimum. The physical characteristics of the BCPs [the electron density at BCP,  $\rho(r)$ , and its Laplacian,  $\nabla^2\rho(r)$  reveal the approximate measure of the amount of electron density built up in the bonding region and as such could be taken as characteristic of the bond. When  $\nabla^2\rho(r) < 0$  and is large in magnitude,  $\rho(r)$  is also large which means that there is a concentration of electronic charge in the internuclear region. This is also an indication of a sharing of electronic charge between both nuclei that defines the covalent (polar) bond. When  $\nabla^2\rho(r) > 0$  there is a depletion of electronic charge in the internuclear region and it indicates a closed shell interaction. Using the AIM 2000 software package, the electron density was integrated over atomic basins according to the quantum theory of atoms in molecules using PROAIM, and thus the BCP data and the molecular graphs were obtained.

Interacting quantum atoms (IQA)<sup>8</sup> approach was done using AIMALL software to understand the nature of intermolecular interactions. Hamiltonian is partitioned into physical atomic and

interatomic contributions. The energy decomposition computed using partitioned Hamiltonian is consistent with the topological method of quantum theory of atoms in molecules. The interatomic energy contribution values determine the nature of intermolecular or intramolecular interactions.

**Electrostatic Surface Potential<sup>9</sup>:** Electrostatic surface potential map illustrate the charge distributions of molecules three dimensionally. These maps allow us to visualize variably charged regions of a molecule. Knowledge of the charge distributions can be used to determine how molecules interact with one another. Gaussian supports the cube keyword to generate the cubes separately from the formatted checkpoint file using the cubegen utility program. This allows for the generation of electrostatic surface potential mapping of the molecule.

**Hirshfeld Analysis<sup>10</sup>:** Important intermolecular interactions within the crystal structure of ArTs were identified through Hirshfeld surface analysis using Crystal Explorer 3.0. The Hirshfeld surface is defined as a set of points in 3D space where the ratio of promolecule and procystal electron densities is equal to 0.5. The exploration of intermolecular contacts is provided by mapping normalized contact distances ( $d_{\text{norm}}$ ), which is a function of a closest distance from the point to the nuclei interior ( $d_i$ ) and exterior ( $d_e$ ) to the surface as well as on the van der Waals radii ( $r^{\text{vdw}}$ ). 2D fingerprint which were generated by deriving from the Hirshfeld surface by plotting the fraction of points on the surface as the function of  $d_i$  and  $d_e$  which provide a visual summary of intermolecular contacts within the crystal.

**Table S1.** Calculated topological properties of the electron density for the intermolecular interaction in ArT derivatives.

| Entry | Interactions | <sup>a</sup> $d$ (Å) | <sup>b</sup> $\rho(r)$ (a.u) | <sup>c</sup> $\nabla^2\rho(r)$ (a.u) | <sup>d</sup> $\Delta E$ (kJ/mol) |
|-------|--------------|----------------------|------------------------------|--------------------------------------|----------------------------------|
| PhTa  | C18 - H74    | 2.869258             | 0.006167                     | 0.018316                             | 3.784658                         |
|       | H10 - C84    | 3.037410             | 0.004071                     | 0.011319                             | 2.401020                         |
|       | H8 - H76     | 2.593224             | 0.003250                     | 0.010807                             | 2.201482                         |
|       | H8 - C78     | 3.245197             | 0.003061                     | 0.008484                             | 1.895611                         |
|       | C25 - H85    | 3.661722             | 0.001513                     | 0.004689                             | 0.838847                         |
| PhTb  | H3 - H65     | 2.275948             | 0.006164                     | 0.021224                             | 4.286129                         |
|       | H5 - C51     | 3.057903             | 0.003539                     | 0.010728                             | 2.129281                         |
|       | C38 - H63    | 3.157225             | 0.003588                     | 0.010501                             | 2.381329                         |
|       | H15 - C86    | 3.067743             | 0.003339                     | 0.010160                             | 2.093836                         |
|       | H13 - C53    | 3.265945             | 0.003282                     | 0.010081                             | 1.763023                         |
|       | H15 - N88    | 3.251315             | 0.002666                     | 0.009460                             | 2.043952                         |
|       | H15 - H76    | 2.851717             | 0.002228                     | 0.008200                             | 1.382326                         |
| NTa   | H10 - C53    | 2.796656             | 0.006585                     | 0.019875                             | 4.186360                         |
|       | C9 - H77     | 3.096091             | 0.003290                     | 0.009102                             | 1.929743                         |
| NTb   | C19 - H80    | 2.801446             | 0.005829                     | 0.017466                             | 3.550989                         |
|       | C9 - H75     | 2.979506             | 0.005034                     | 0.016243                             | 3.327821                         |
|       | H4 - C81     | 3.027458             | 0.004711                     | 0.013909                             | 2.789594                         |
|       | H20 - C90    | 3.085807             | 0.003749                     | 0.010015                             | 2.242177                         |
|       | C16 - H91    | 3.316699             | 0.002773                     | 0.007919                             | 1.508350                         |
|       | H38 - H82    | 3.134481             | 0.000789                     | 0.003223                             | 0.439771                         |
| AT    | C11 - H80    | 2.762195             | 0.006568                     | 0.019056                             | 3.972382                         |

|       |            |          |          |          |           |
|-------|------------|----------|----------|----------|-----------|
|       | C32 - H82  | 3.076903 | 0.003594 | 0.010584 | 2.273683  |
| PheTa | H28 - C104 | 2.668934 | 0.006929 | 0.020771 | 4.167981  |
|       | C41 - H105 | 3.113388 | 0.003586 | 0.010549 | 2.444341  |
|       | C12 - H89  | 3.581864 | 0.001448 | 0.004489 | 0.834909  |
|       | C8 - H87   | 3.948631 | 0.000773 | 0.002712 | 0.393825  |
|       | H26 - H87  | 3.326696 | 0.000544 | 0.002342 | 0.270427  |
|       | C16 - C78  | 6.066116 | 0.000045 | 0.000145 | 0.007877  |
| PheTb | H17 - C63  | 5.333789 | 0.005763 | 0.016758 | 3.674387  |
|       | H15 - C61  | 5.560591 | 0.004686 | 0.014297 | 3.063959  |
|       | H19 - C66  | 5.698480 | 0.004471 | 0.012319 | 2.639940  |
|       | H13 - C78  | 5.702916 | 0.004262 | 0.011691 | 2.638628  |
|       | C16 - H82  | 5.883152 | 0.003244 | 0.008800 | 1.886422  |
| PheTc | H3 - C91   | 2.797737 | 0.005762 | 0.015795 | 3.369829  |
|       | H23 - N112 | 2.822536 | 0.005595 | 0.015440 | 3.972382  |
|       | H23 - H103 | 2.490894 | 0.004390 | 0.015374 | 3.000947  |
|       | H55 - H94  | 2.540566 | 0.003441 | 0.011933 | 2.391831  |
|       | C32 - C93  | 3.591239 | 0.003932 | 0.010805 | 2.082022  |
|       | C54 - H96  | 3.142948 | 0.003713 | 0.010482 | 2.168663  |
| PyT   | H28 - C76  | 2.837892 | 0.005676 | 0.017563 | 3.662573  |
|       | C7 - H91   | 2.863333 | 0.004916 | 0.013894 | 2.973379  |
|       | H30 - C70  | 2.918995 | 0.004890 | 0.013817 | 3.065271  |
|       | C4 - H93   | 2.924587 | 0.004811 | 0.013394 | 2.910367  |
|       | H10 - C99  | 3.063383 | 0.004276 | 0.012203 | 2.580867  |
|       | C12 - C101 | 3.594224 | 0.003811 | 0.012148 | 2.171289  |
|       | H3 - C77   | 3.079572 | 0.004112 | 0.011311 | 2.294687  |
|       | C50 - H68  | 3.139021 | 0.003548 | 0.011203 | 2.022948  |
|       | C52 - H71  | 3.484526 | 0.001977 | 0.006043 | 1.214294  |
| PeTa  | H6 - H8    | 2.017345 | 0.012581 | 0.059869 | 11.415674 |
|       | H70 - H72  | 2.017432 | 0.012549 | 0.059477 | 11.302778 |
|       | H76 - C97  | 2.547640 | 0.010816 | 0.044692 | 8.591949  |
|       | H12 - C33  | 2.547683 | 0.010828 | 0.044689 | 8.607702  |
|       | C25 - H105 | 2.859843 | 0.005266 | 0.015480 | 3.356702  |
|       | C1 - H103  | 2.864382 | 0.005470 | 0.015177 | 3.277937  |
|       | C45 - H66  | 3.107193 | 0.004237 | 0.014141 | 2.482410  |
|       | H22 - H125 | 2.697149 | 0.003727 | 0.012385 | 2.226424  |
|       | H36 - C83  | 2.968994 | 0.004431 | 0.012150 | 2.618936  |
|       | H34 - C81  | 2.998776 | 0.004157 | 0.011698 | 2.509978  |
|       | C9 - H80   | 3.105926 | 0.004118 | 0.011187 | 2.385267  |
|       | C7 - H78   | 3.091322 | 0.003916 | 0.010919 | 2.322255  |
|       | C47 - H86  | 3.248210 | 0.003019 | 0.008718 | 1.833912  |
|       | H2 - C124  | 3.491959 | 0.002113 | 0.006635 | 1.253676  |
| PeTb  | H70 - H72  | 2.017345 | 0.012545 | 0.060247 | 11.456369 |
|       | H6 - H8    | 2.017345 | 0.012541 | 0.059519 | 11.300152 |
|       | H12 - C33  | 2.547683 | 0.010835 | 0.044745 | 8.628706  |
|       | H76 - C97  | 2.547640 | 0.010827 | 0.044697 | 8.620829  |
|       | C33 - H74  | 2.678831 | 0.006836 | 0.021671 | 4.351766  |

|            |          |          |          |          |
|------------|----------|----------|----------|----------|
| C19 - H68  | 3.050146 | 0.004580 | 0.013900 | 2.776466 |
| H46 - H127 | 2.483759 | 0.003835 | 0.012900 | 2.666195 |
| C29 - H70  | 3.095787 | 0.003985 | 0.012163 | 2.443028 |
| C15 - H72  | 3.138475 | 0.003873 | 0.011899 | 2.473221 |
| H46 - C99  | 3.142016 | 0.003525 | 0.010614 | 2.227737 |
| H44 - C99  | 3.325228 | 0.002354 | 0.008263 | 1.429585 |
| C45 - H116 | 3.513555 | 0.001654 | 0.005200 | 0.870353 |

<sup>a</sup>d=distance, <sup>b</sup> $\rho(r)$ =electron density at BCP, <sup>c</sup> $\nabla^2\rho(r)$ =Laplacian of electron density at BCP,

<sup>d</sup>dE=dissociation energy. a, b and c indicate different dimers of same molecule.

**Table S2.** Various intermolecular interactions estimated for ArT derivatives from Hirshfeld surface analysis.

| Entry | C•••C | C•••H  | C•••N | N•••H | H•••H  | $\rho[(\%C\bullet\bullet\bullet H)/(\%C\bullet\bullet\bullet C)]$ |
|-------|-------|--------|-------|-------|--------|-------------------------------------------------------------------|
| PhT   | 0.5 % | 36.3 % | 0     | 0.8 % | 62.4 % | 72.6                                                              |
| NT    | 1.0 % | 36.2 % | 0.1 % | 0.6 % | 62.0 % | 36.2                                                              |
| AT    | 0.4 % | 40.5 % | 0     | 0.3 % | 58.9 % | 101.2                                                             |
| PheT  | 1.3 % | 40.3 % | 0.2 % | 0.7 % | 57.6 % | 31.0                                                              |
| PyT   | 3.2 % | 39.5 % | 0     | 0.3 % | 57.1 % | 12.3                                                              |
| PeT   | 4.0 % | 41.5 % | 0     | 0.6 % | 53.6 % | 10.4                                                              |

**Table S3.** Geometry optimized (B3LYP/6-311+G\*\* level of theory) calculations and redox properties of ArT derivatives using Gaussian 09.

| Compounds | Energy (ev) |         |         |         | Eg (ev) |
|-----------|-------------|---------|---------|---------|---------|
|           | HOMO-1      | HOMO    | LUMO    | LUMO+1  |         |
| PhT       | -6.5446     | -5.1995 | -1.1505 | -0.8607 | 4.0490  |
| NT        | -6.0243     | -5.2205 | -1.3630 | -0.8493 | 3.8575  |
| AT        | -5.5435     | -5.1193 | -1.7638 | -0.8634 | 3.3555  |
| PheT      | -6.0344     | -5.3549 | -1.2838 | -1.2569 | 4.0711  |
| PyT       | -5.6509     | -5.1454 | -1.7489 | -0.9260 | 3.3965  |
| PeT       | -5.4581     | -4.9821 | -2.2109 | -0.9181 | 2.7712  |

**Table S4.** Fluorescence Quantum yield ( $\phi_f$ ) of aromatic hydrocarbons.

| Ar                                                               | $\phi_f$           |                    |
|------------------------------------------------------------------|--------------------|--------------------|
|                                                                  | Solution State     | Solid State        |
| Benzene                                                          | 0.06 <sup>a</sup>  | -                  |
| Naphthalene                                                      | 0.23 <sup>a</sup>  | -                  |
| Anthracene                                                       | 0.28 <sup>11</sup> | 0.64 <sup>11</sup> |
| Phenanthrene                                                     | 0.13 <sup>a</sup>  | -                  |
| Pyrene                                                           | 0.32 <sup>12</sup> | 0.68 <sup>11</sup> |
| Perylene                                                         | 0.94 <sup>a</sup>  | 0.31 <sup>11</sup> |
| a-Brouwer, A.M., <i>Pure Appl. Chem.</i> <b>2011</b> , 83, 2213. |                    |                    |

**Table S5.** Quantum yield ( $\phi_f$ ) of ArT derivatives in different solvents.

| Solvent         | PhT  | NT   | AT   | PheT | PyT  | PeT  |
|-----------------|------|------|------|------|------|------|
| Hexane          | 0.41 | 0.40 | 0.24 | 0.36 | 0.60 | 0.40 |
| Toluene         | 0.69 | 0.51 | 0.32 | 0.49 | 0.78 | 0.57 |
| DCM             | 0.51 | 0.41 | 0.37 | 0.64 | 0.61 | 0.41 |
| Tetrahydrofuran | 0.41 | 0.43 | 0.30 | 0.42 | 0.59 | 0.46 |
| Acetonitrile    | 0.49 | 0.49 | 0.29 | 0.52 | 0.60 | 0.41 |



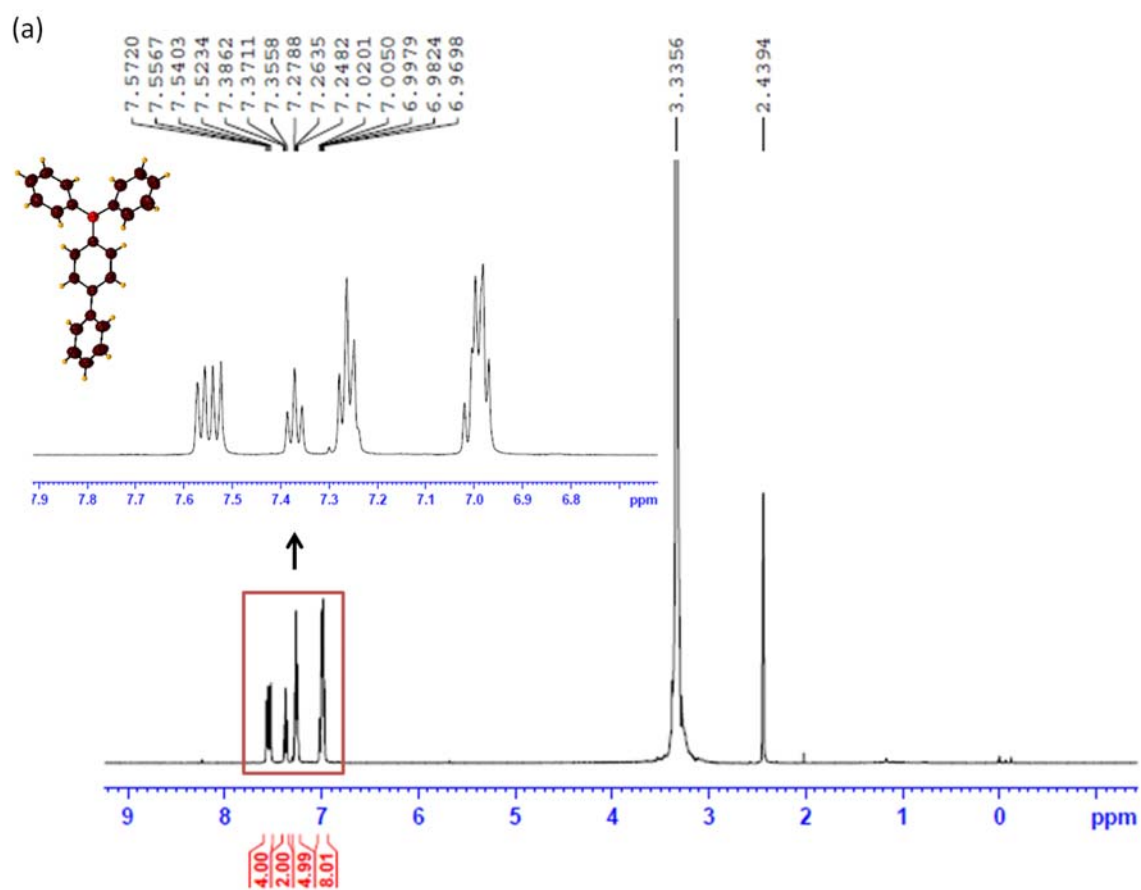

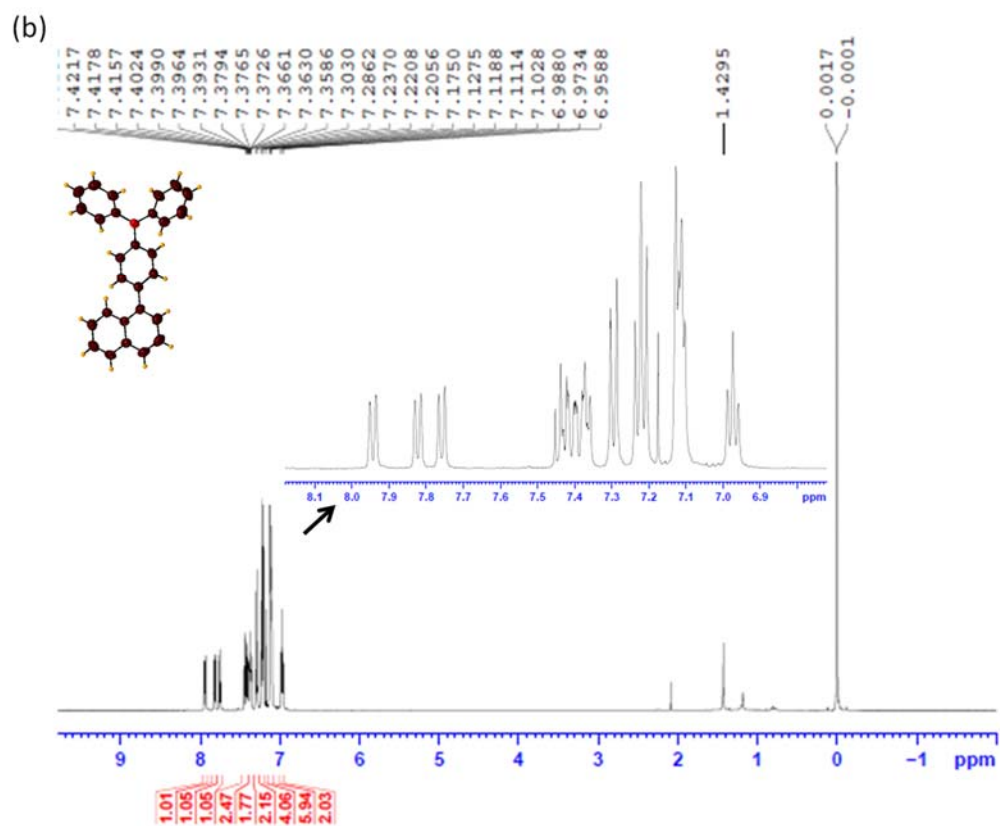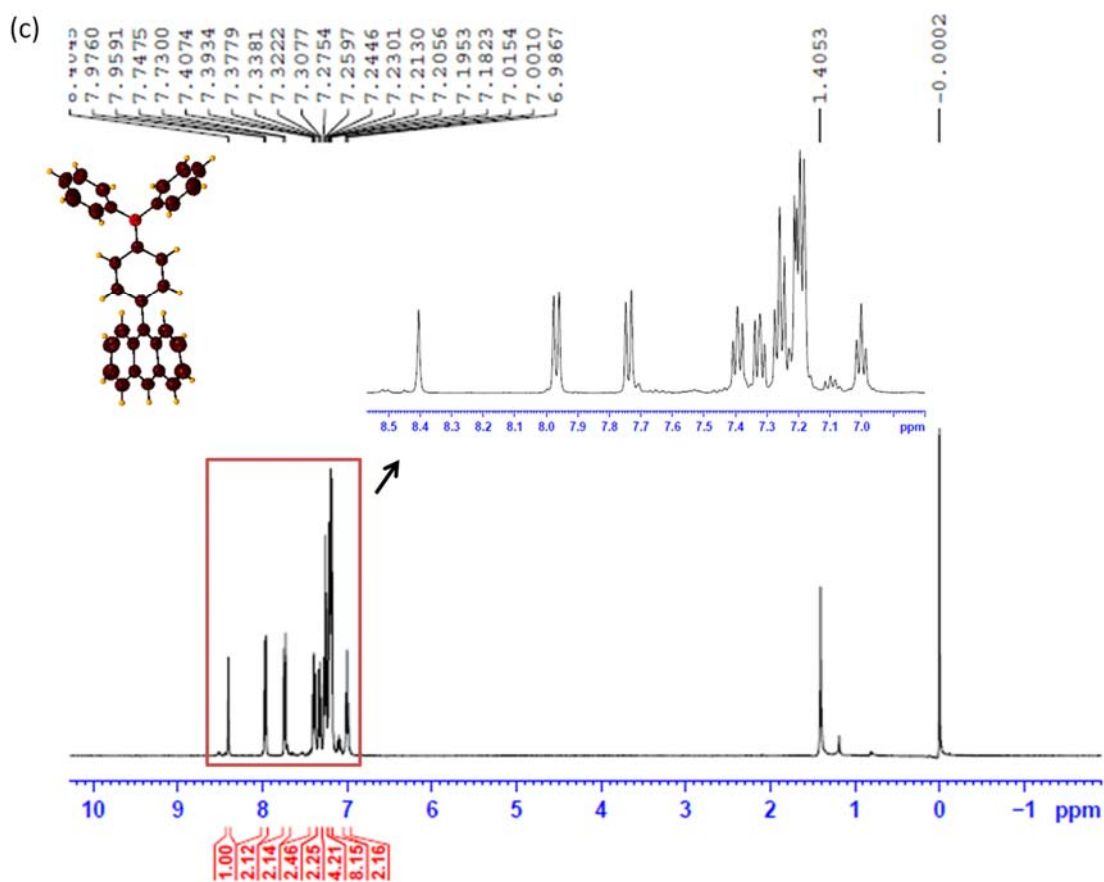

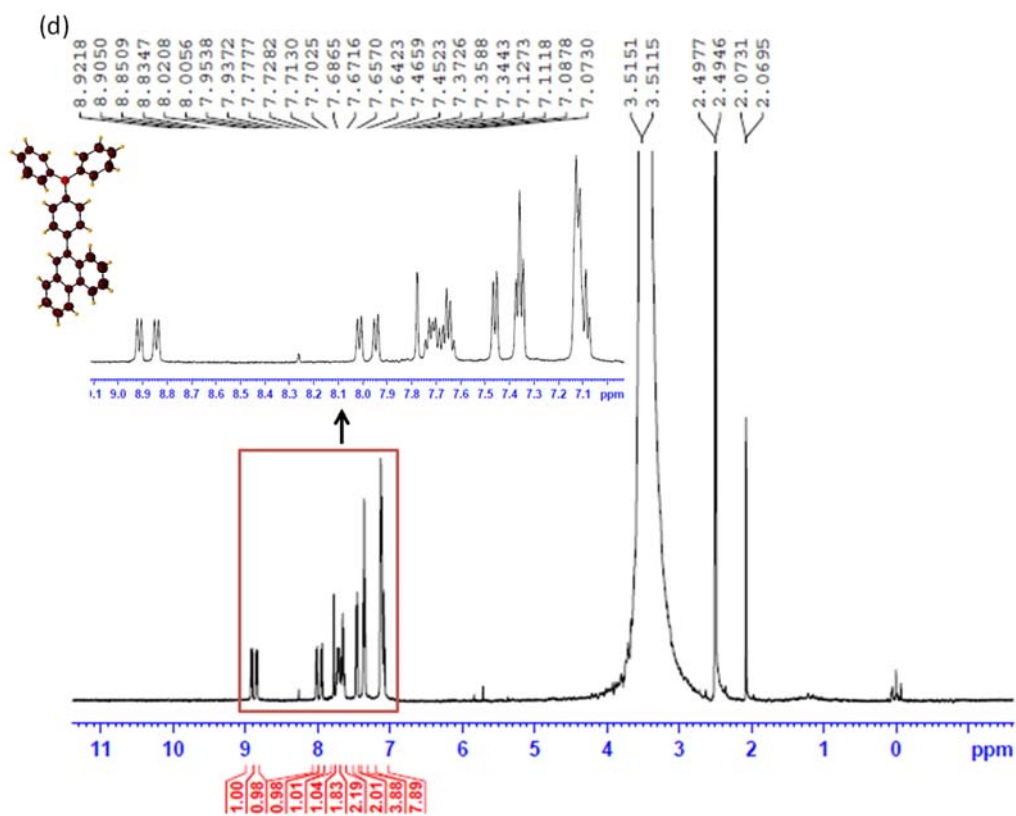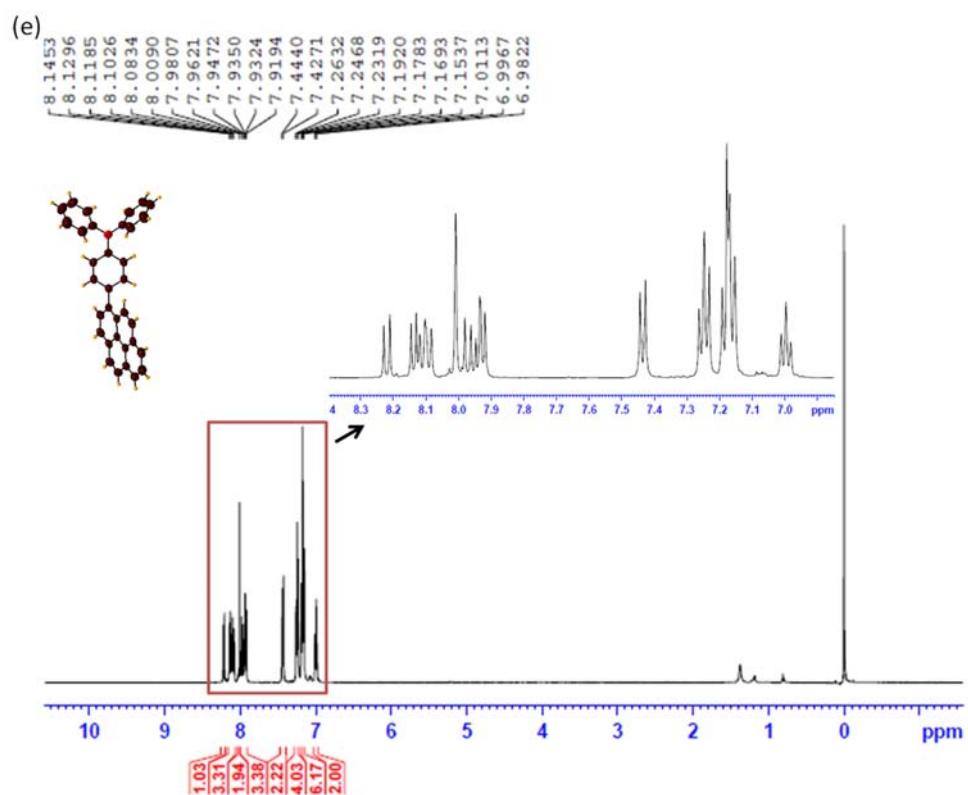

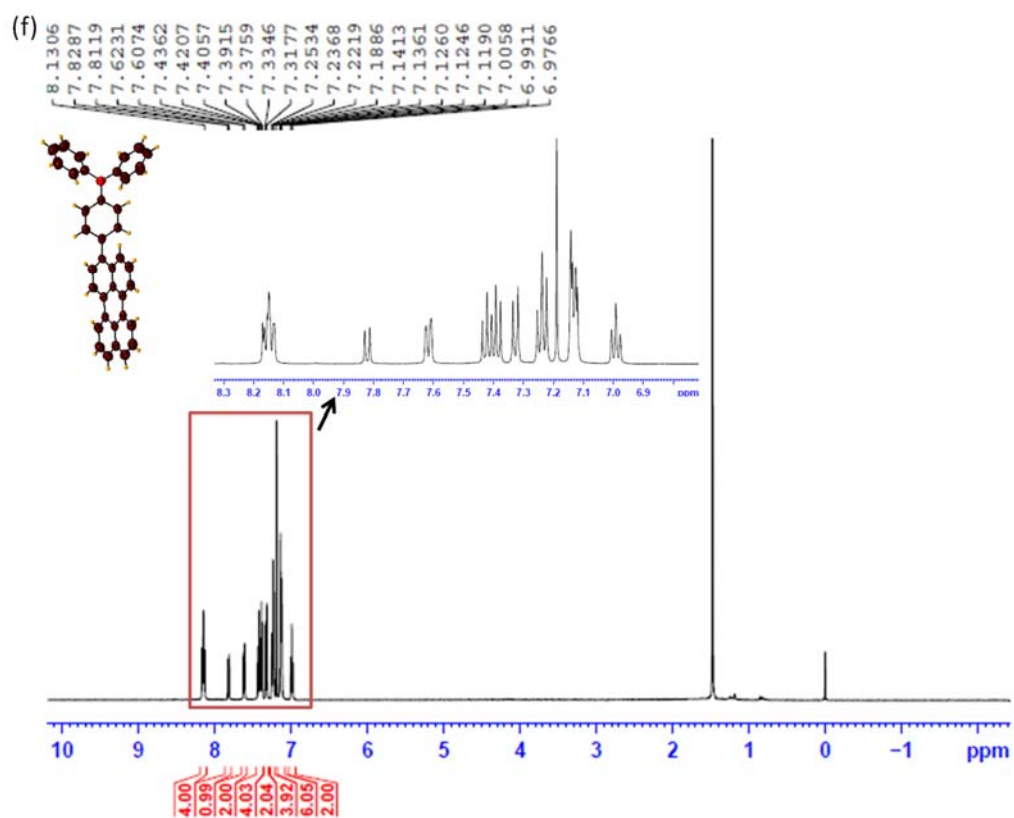

**Fig. S1**  $^1\text{H}$ -NMR spectra of (a) PhT, (b) NT, (c) AT, (d) PheT, (e) PyT and (f) PeT.

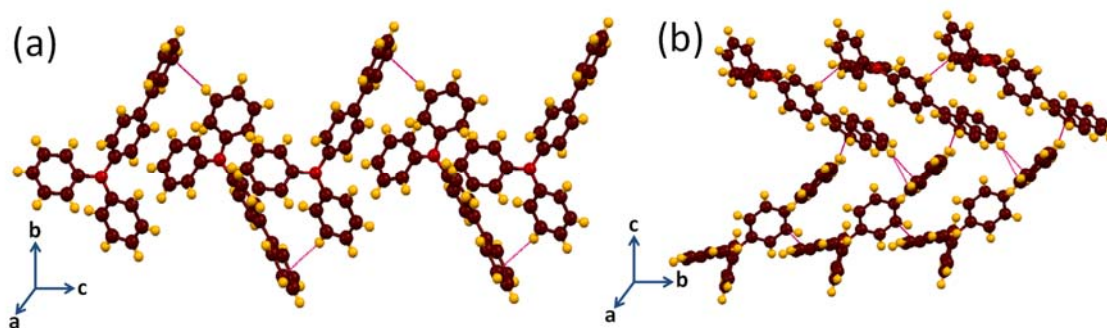

**Fig. S2** (a) C-H...C directed zig-zag arrangement in PhT and (b) duplex structure in NT.

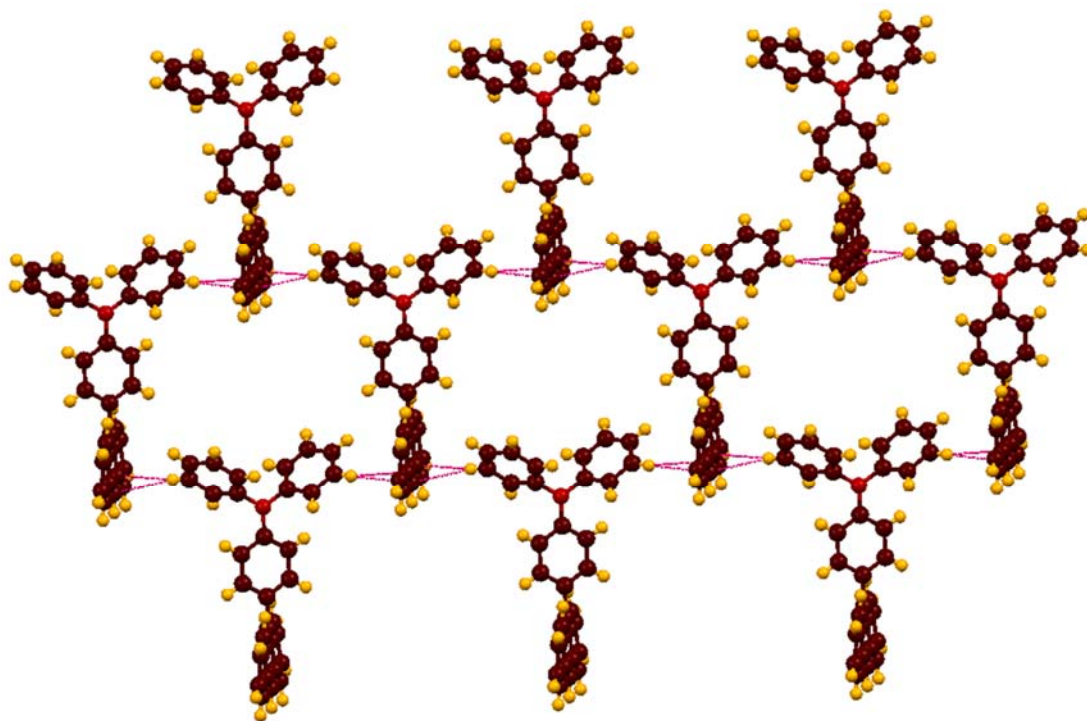

**Fig. S3** C-H...C directed 2D-network in AT.

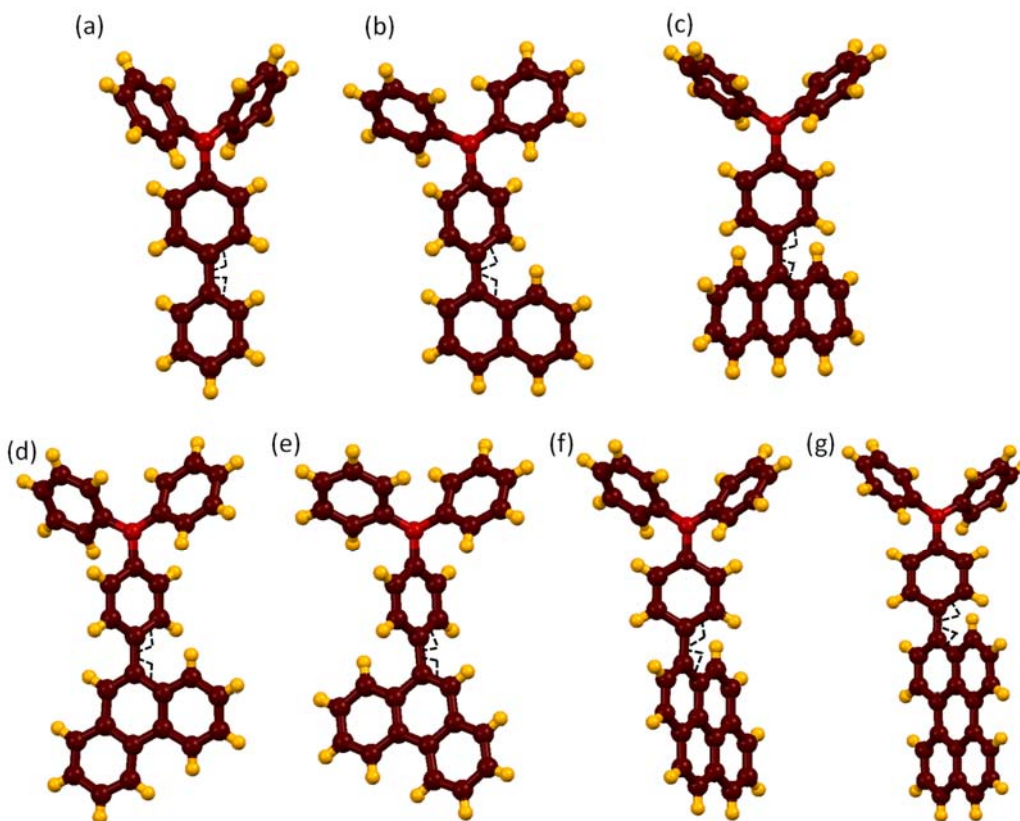

**Fig. S4** Torsion angles between Ar and T units in (a) PhT, (b) NT, (c) AT, (d-e) PheT, (f) PyT and (g) PeT (torsion angle is measured across the labelled bonds).

(a)

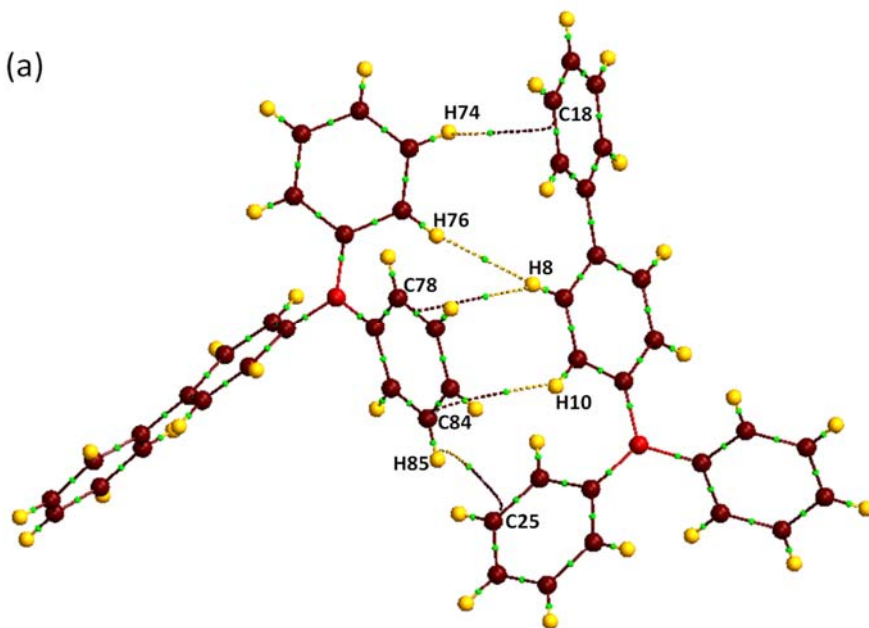

(b)

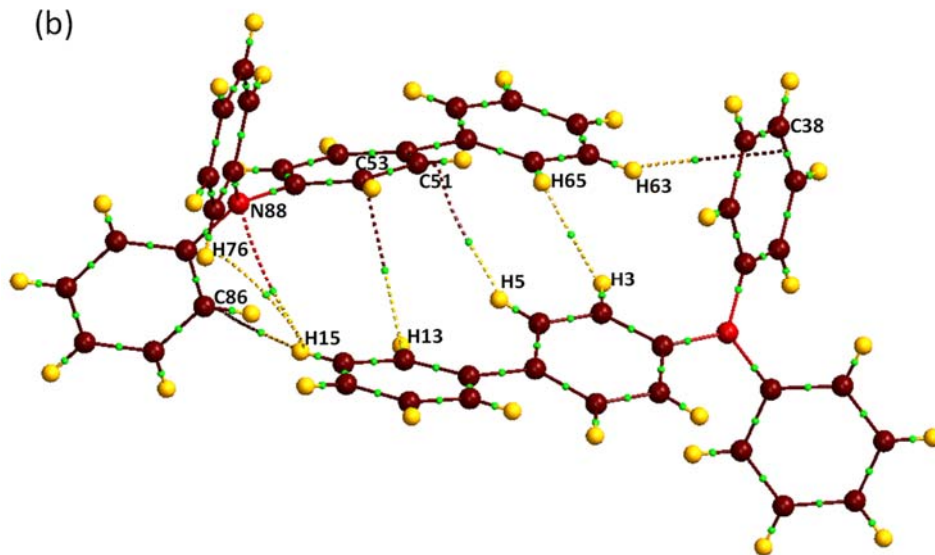



(c)

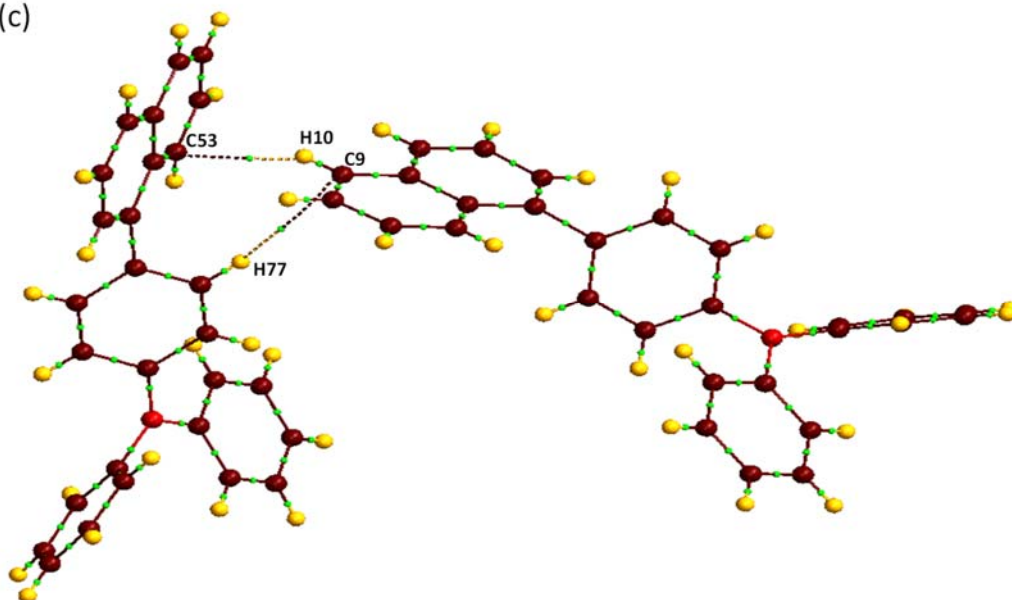

(d)

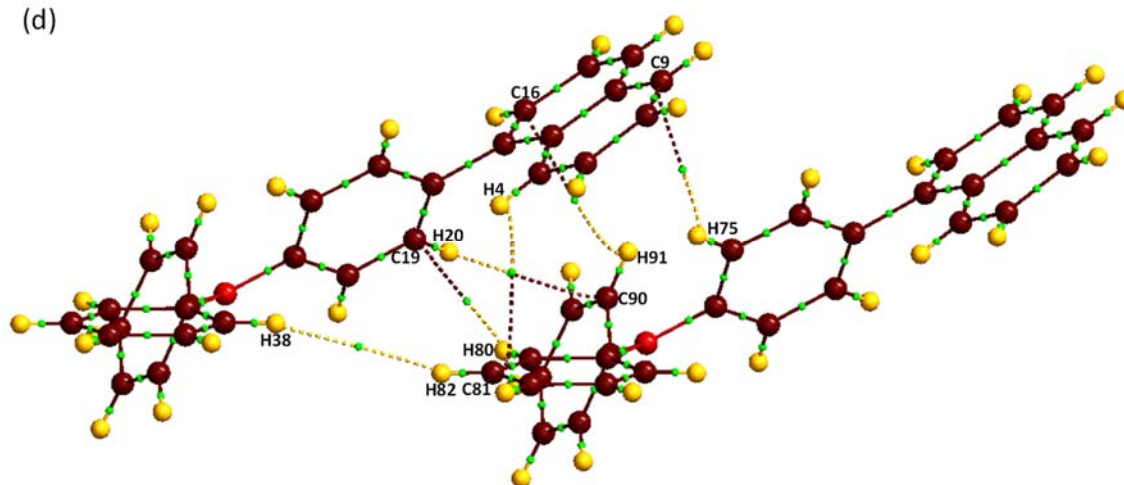

(e)

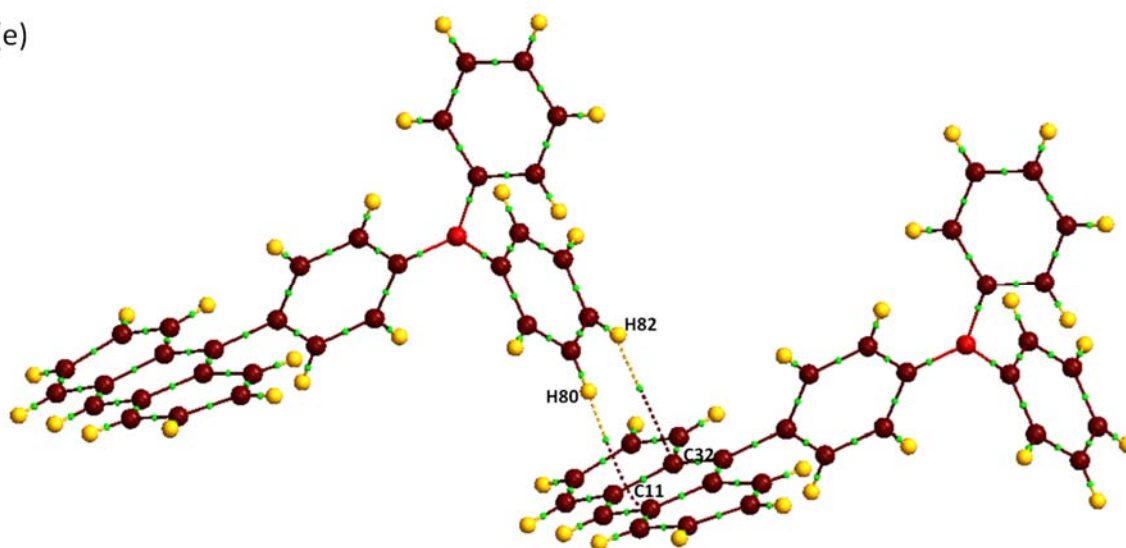

(f)

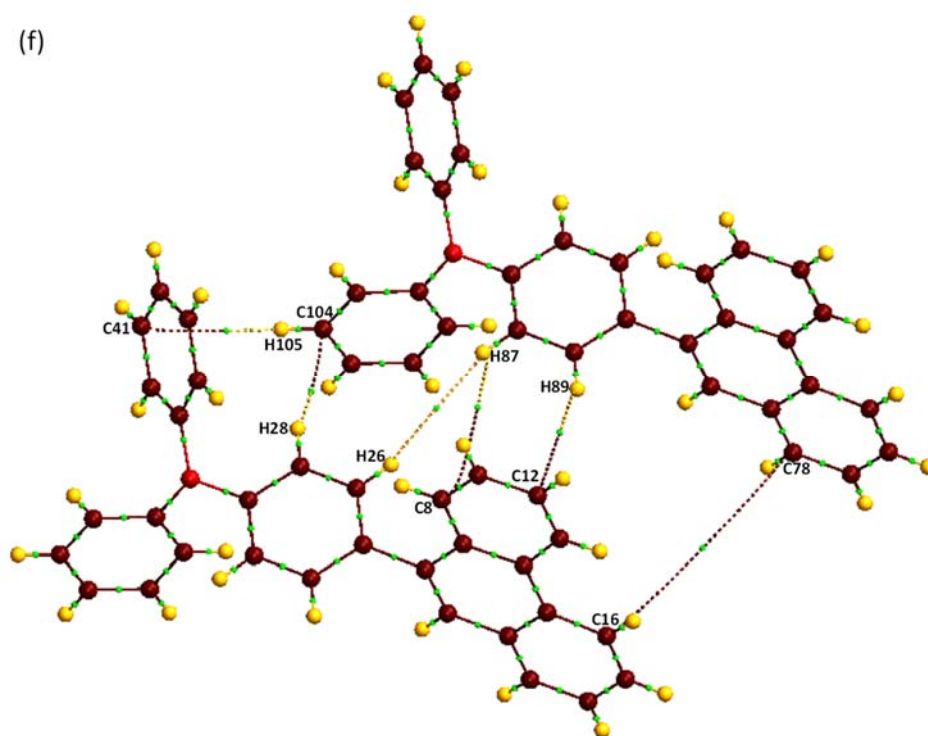



(g)

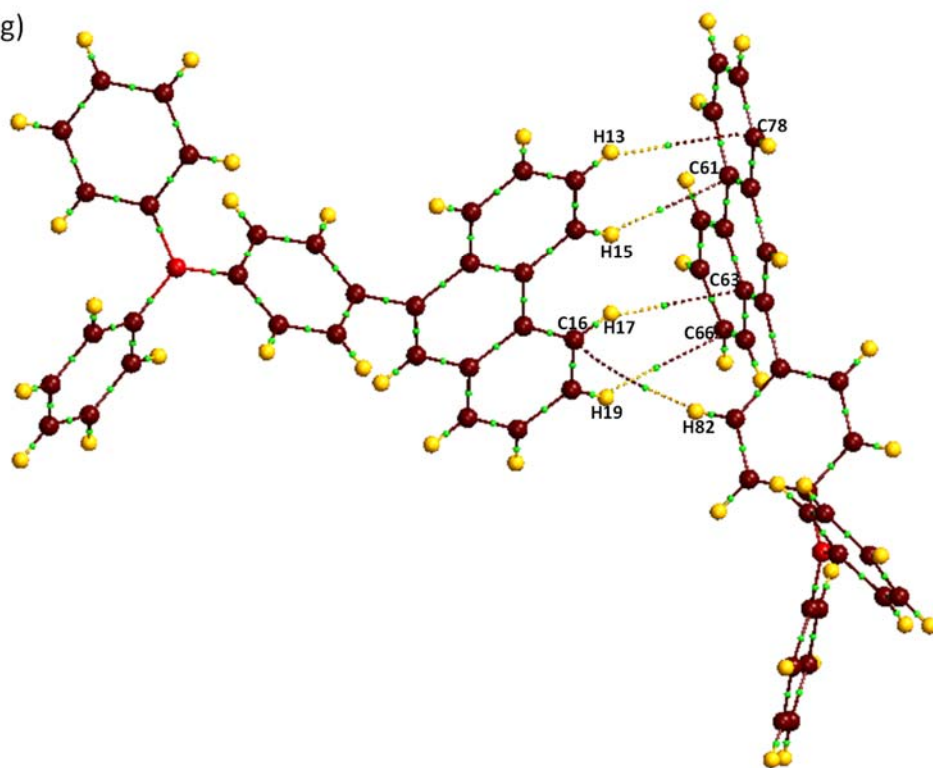

(h)

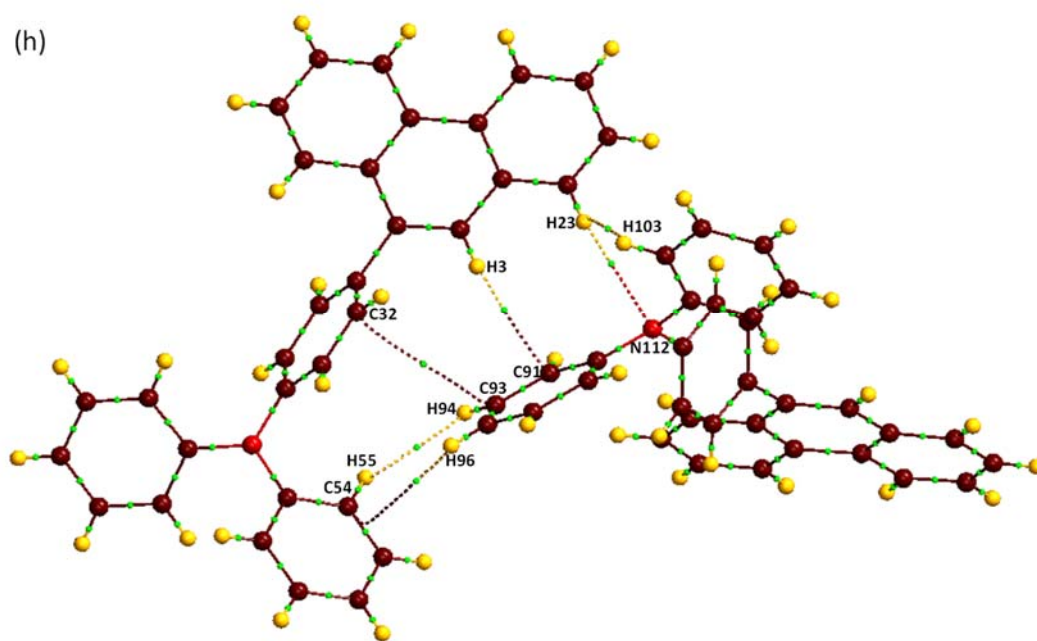

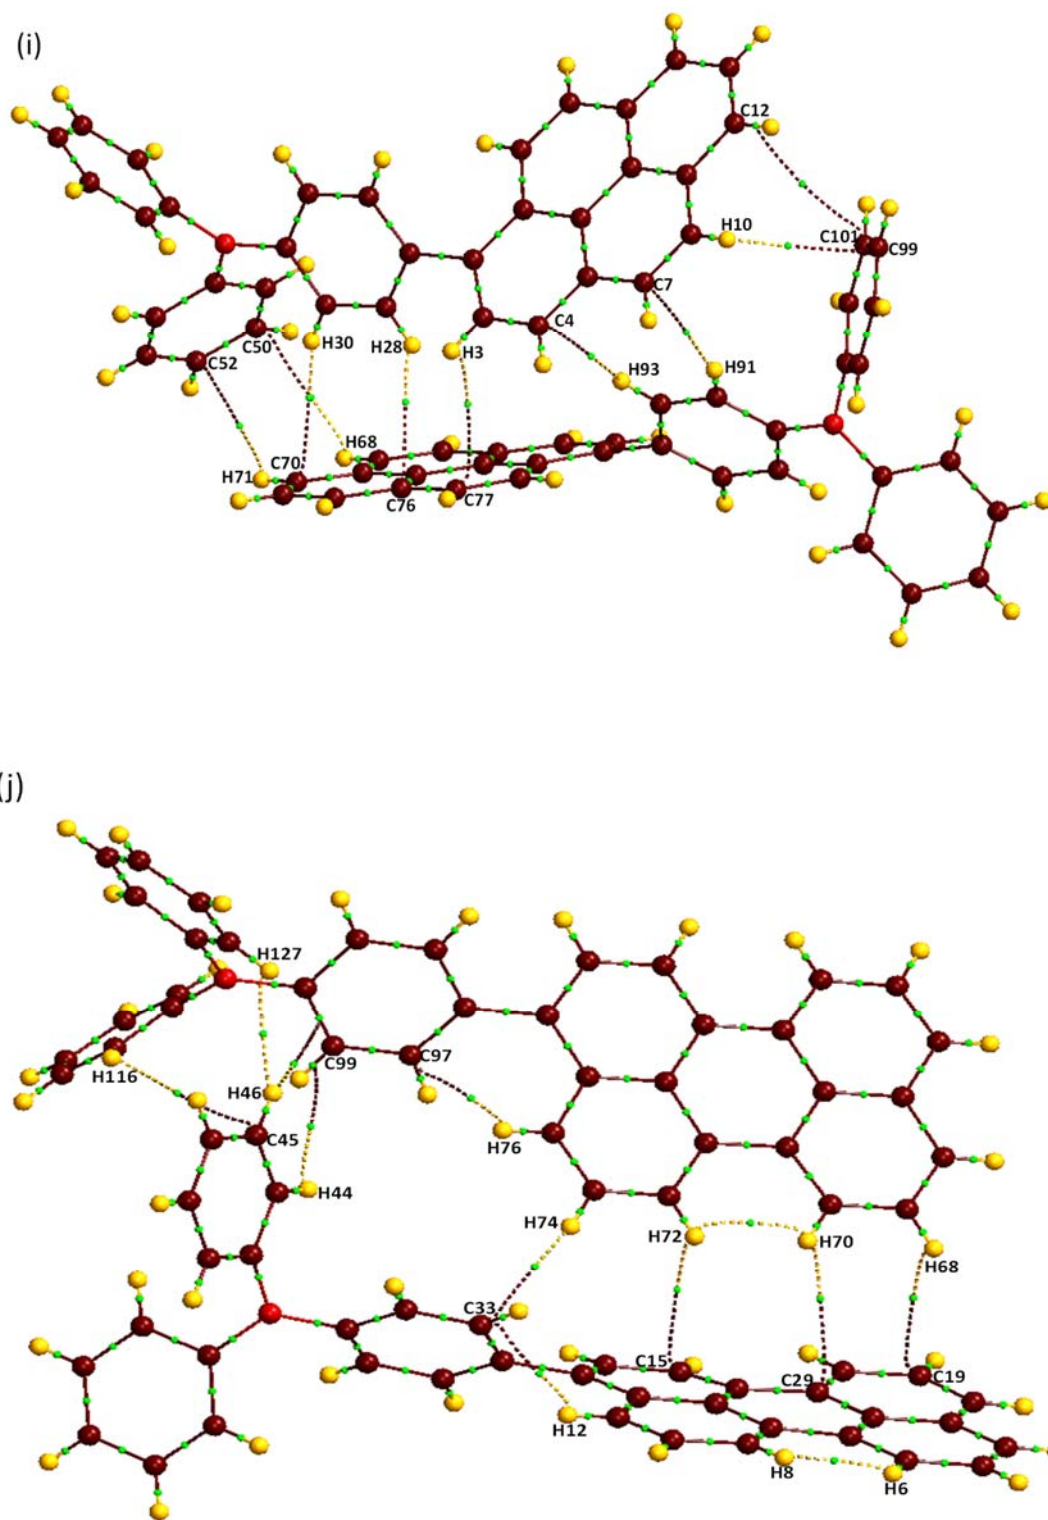

**Fig. S5** QTAIM electron density maps of (a) PhTa, (b) PhTb, (c) NTa, (d) NTb, (e) AT, (f) PheTa, (g) PheTb, (h) PheTc, (i) PyT and (j) PeTb. Dotted lines shown are bond paths and the green dots are bond critical points (BCP). Bond path with a BCP indicate the existence of intermolecular interactions in different molecules.

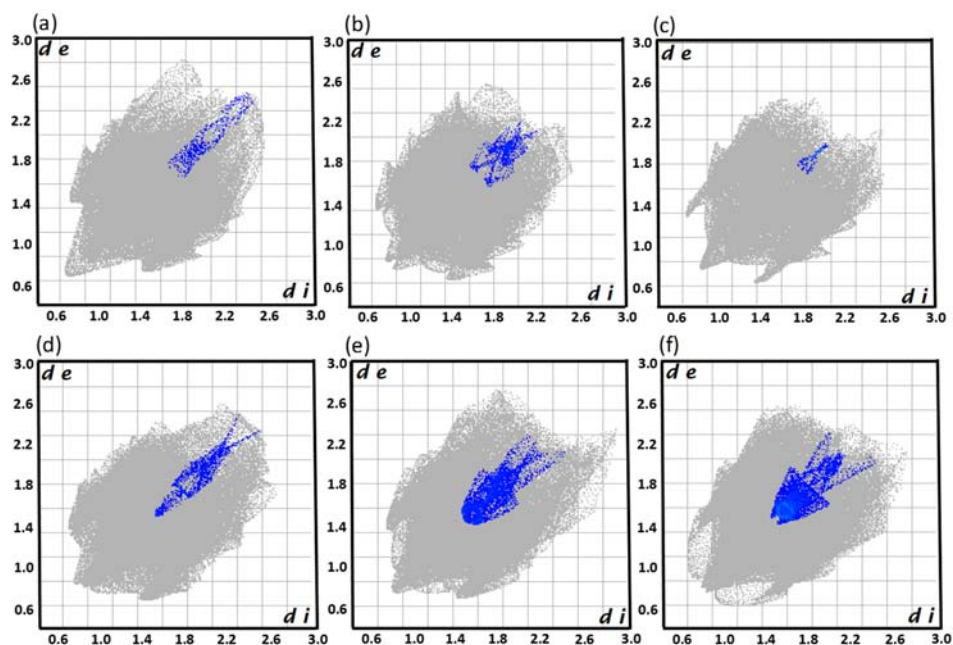

**Fig. S6** 2D-dimensional fingerprint plots representing C•••C interactions in crystalline (a) PhT, (b) NT, (c) AT, (d) PheT, (e) PyT and (f) PeT obtained from Hirshfeld analyses.

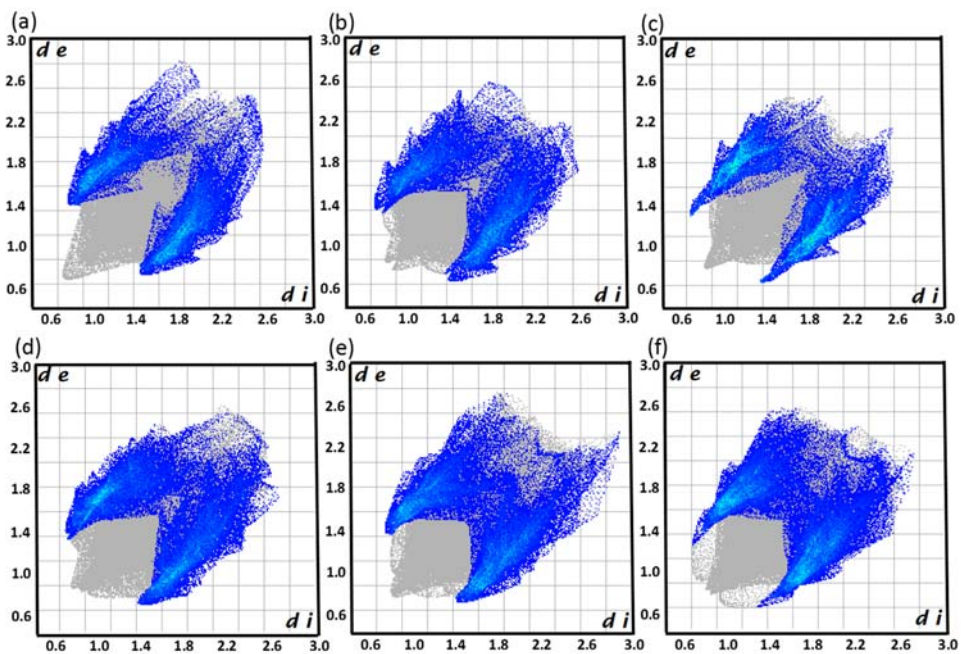

**Fig. S7** 2D-dimensional fingerprint plots representing C-H•••C interactions in crystalline (a) PhT, (b) NT, (c) AT, (d) PheT, (e) PyT and (f) PeT obtained from Hirshfeld analyses.

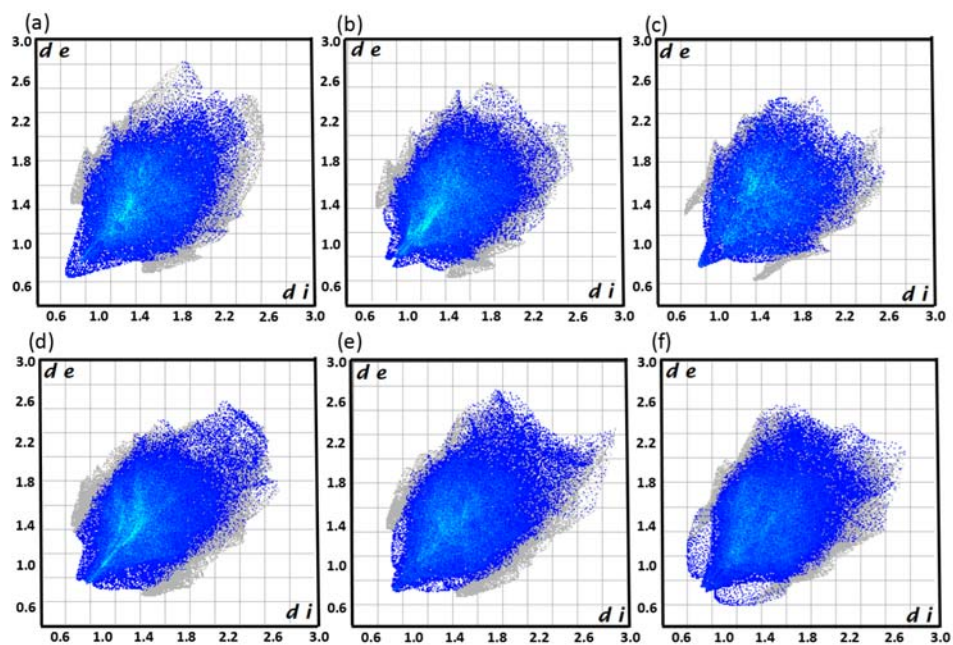

**Fig. S8** 2D-dimensional fingerprint plots representing C-H...H-C interactions in crystalline (a) PhT, (b) NT, (c) AT, (d) PheT, (e) PyT and (f) PeT obtained from Hirshfeld analyses.

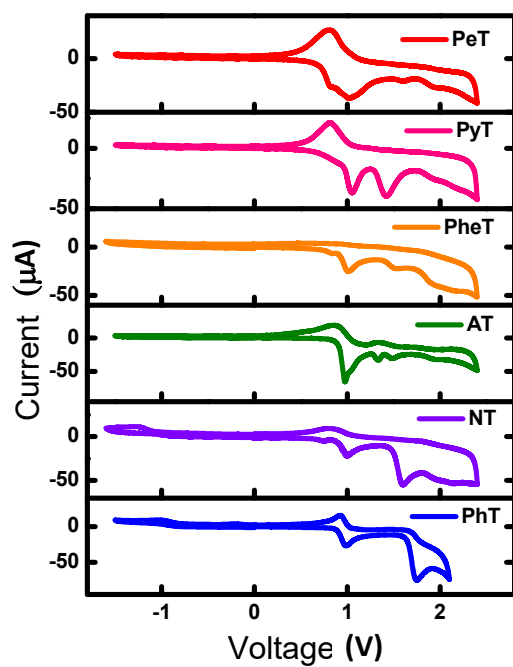

**Fig. S9** Cyclic voltammetric measurements of ArT derivatives in DCM.

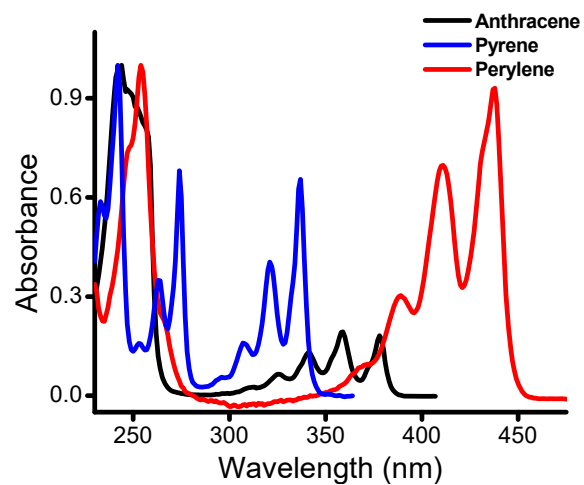

**Fig. S10** The absorption spectra of anthracene, pyrene and perylene in DCM.

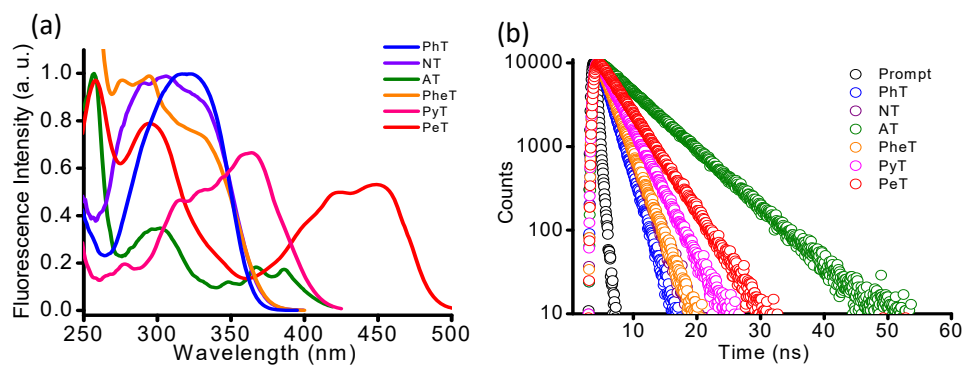

**Fig. S11** (a) Excitation spectra and (b) fluorescent decay profile of ArT in DCM.

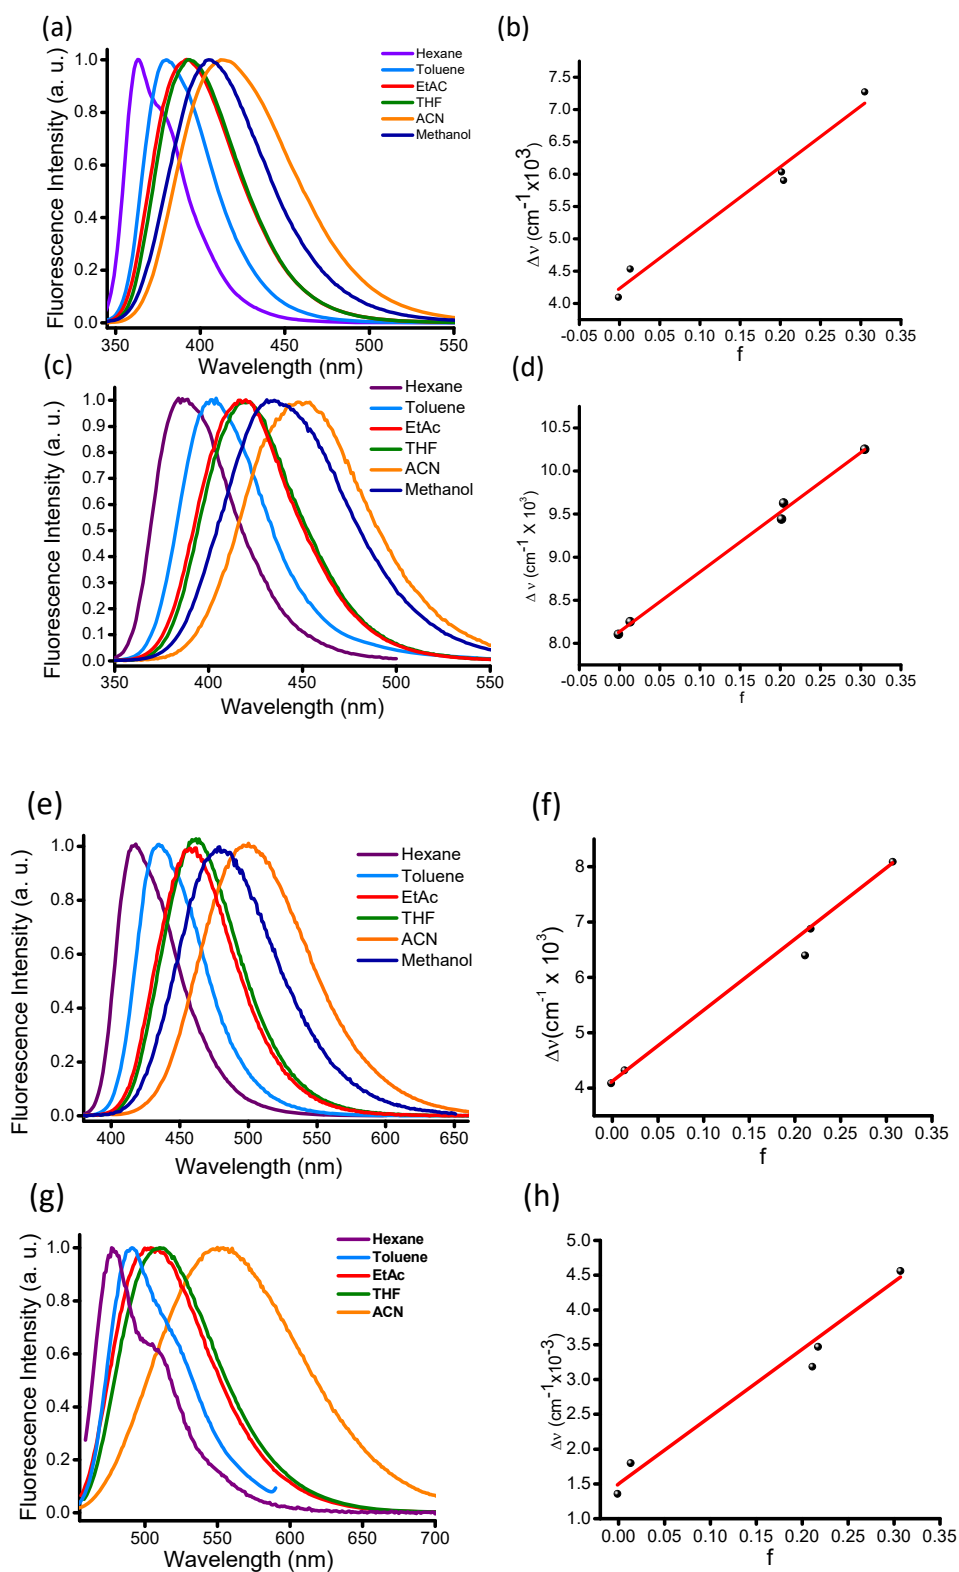

**Fig. S12** Solvent polarity dependent normalized emission spectra of (a) PhT, (c) NT, (e) PyT and (g) PeT. Solvent polarity dependent Lippert-Mataga plots of (b) PhT, (d) NT, (f) PyT and (h) PeT.



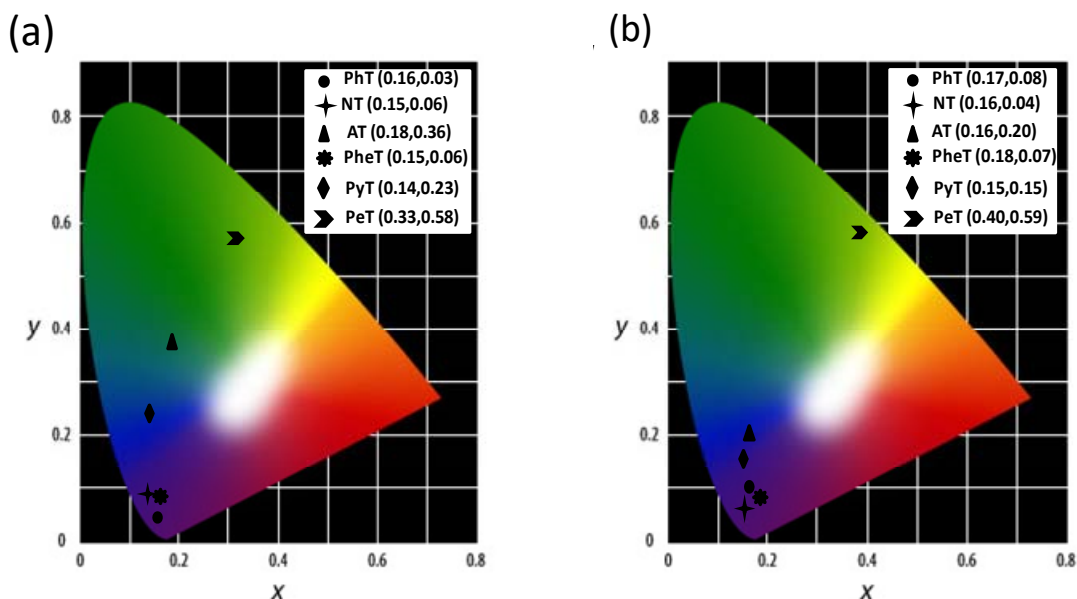

Fig. S13 CIE coordinates of ArT derivatives in (a) DCM and (b) crystalline state.

## REFERENCES

1. J. R. Lakowicz, *Principles of Fluorescence Spectroscopy*, Springer, New York, 2006.
2. (a) E. Lippert and Z. Naturforsch, *Astrophys. Phys. Phys. Chem.*, 1955, 10, 541-545; (b) A. R. Mallia, P. S. Salini and M. Hariharan, *J. Am. Chem. Soc.*, 2015, 137, 15604-15607.
3. Gaussian 09, M. J. Frisch, G. W. Trucks, H. B. Schlegel, G. E. Scuseria, M. A. Robb, J. R. Cheeseman, G. Scalmani, V. Barone, B. Mennucci, G. A. Petersson, H. Nakatsuji, M. Caricato, X. Li, H. P. Hratchian, A. F. Izmaylov, J. Bloino, G. Zheng, J. L. Sonnenberg, M. Hada, M. Ehara, K. Toyota, R. Fukuda, J. Hasegawa, M. Ishida, T. Nakajima, Y. Honda, O. Kitao, H. Nakai, T. Vreven, J. A. Montgomery Jr., J. E. Peralta, F. Ogliaro, M. J. Bearpark, J. Heyd, E. N. Brothers, K. N. Kudin, V. N. Staroverov, R. Kobayashi, J. Normand, K. Raghavachari, A. P. Rendell, J. C. Burant, S. S. Iyengar, J. Tomasi, M. Cossi, N. Rega, N. J. Millam, M. Klene, J. E. Knox, J. B. Cross, V. Bakken, C. Adamo, J. Jaramillo, R. Gomperts, R. E. Stratmann, O. Yazyev, A. J. Austin, R. Cammi, C. Pomelli, J. W. Ochterski, R. L. Martin, K. Morokuma, V. G. Zakrzewski, G. A. Voth, P. Salvador, J. J. Dannenberg, S. Dapprich, A. D. Daniels, Ö. Farkas, J. B. Foresman, J. V. Ortiz, J. Cioslowski and D. J. Fox, Wallingford, CT, USA, 2009.
4. Z. E. X. Dance, S. M. Mickley, T. M. Wilson, A. B. Ricks, A. M. Scott, M. A. Ratner and M. R. Wasielewski, *J. Phys. Chem. A*, 2008, 112, 4194-4201.
5. A. R. Mallia, R. Sethy, V. Bhat and M. Hariharan, *J. Mat. Chem. C*, 2016, 4, 2931-2935.
6. P. Deng, L. Liu, S. Ren, H. Li and Q. Zhang, *Chem. Commun. (Cambridge, U. K.)*, 2012, 48, 6960-6962.
7. R. F. W. Bader, *Atoms in Molecules: A Quantum Theory*, Oxford University Press, Oxford, U.K., 1990.
8. (a) M. Yahia-Ouahmed, V. Tognetti and L. Joubert, *J. Chem. Theory Comput.*, 2015, 1053, 254-262; (b) M. A. Blanco, A. Martín Pendás and E. Francisco, *J. Chem. Theory Comput.*, 2005, 1, 1096-1109; (c) A. Martín Pendás, M. A. Blanco and E. Francisco, *J. Chem. Phys.*, 2006, 125, 184112.
9. H. Wang, W. Wang and W. J. Jin, *Chem. Rev.*, 2016, 116, 5072-5104.
10. *CrystalExplorer 3.0*, S. K. Wolff, D. J. Grinwood, J. J. McKinnon, M. J. Turner, D. Jayatilaka and M. A. Spackman, University of Western Australia, Perth, Australia, 2012.

11. R. Katoh, K. Suzuki, A. Furube, M. Kotani and K. Tokumaru, *J. Phys. Chem. C*, 2009, 113, 2961-2965.
12. I. B. Berlman, *Handbook of Fluorescence Spectra of Aromatic Molecules*, Academic Press, New York, 1971.
